# Supplementary material
Source: MDPI journal article supplement (https://www.mdpi.com/1999-4915/12/11/1282)
Supplement: s1 [file s1]

Archive with 2 entries (2 files):
- viruses-945799 SUP Figure S1.pdf
- viruses-945799 SUP Movie_M1.pptx
